# Supplementary material for: Identification and functional application of a new malonyltransferase NbMaT1 towards diverse aromatic glycosides from Nicotiana benthamiana
Source: Royal Society of Chemistry journal article supplement (doi:10.1039/c7ra01940h), 2017-01-01
Supplement: c7ra01940h1.pdf [file c7ra01940h1.pdf]

**Identification and functional application of a new malonyltransferase  
NbMaT1 towards diverse aromatic glycosides from *Nicotiana  
benthamiana***

Yuyu Liu,<sup>a</sup> Xiaohui Wang,<sup>a</sup> Ting Mo,<sup>a</sup> Yaru Yan<sup>a</sup>, Yuelin Song,<sup>a</sup> Yunfang Zhao,<sup>a</sup>  
Jun Li,<sup>a</sup> Shepo Shi,<sup>a</sup> Xiao Liu,<sup>\*a</sup> Pengfei Tu<sup>\*a</sup>

<sup>a</sup>Modern Research Center for Traditional Chinese Medicine, School of Chinese Materia  
Medica, Beijing University of Chinese Medicine, Beijing 100029, People's Republic  
of China

\* fliuxiao@163.com; \* pengfeitu@163.com;

Tel/Fax: (86)-10-82802750

## Supplementary Material

### Table of Contents

|                                                                                                                                   |             |
|-----------------------------------------------------------------------------------------------------------------------------------|-------------|
| <b>Figure S1.</b> Multiple alignment of the deduced amino acid sequence of NbMaT1 and related enzymes.....                        | <b>3</b>    |
| <b>Figure S2.</b> HPLC-UV spectra of standard malonyl-CoA and enzymatic synthesis of malonyl-CoA by MatB.....                     | <b>4</b>    |
| <b>Figures S3–S18.</b> HPLC-UV and HR-ESI-MS analyses of malonylated product of <b>1-16</b> .....                                 | <b>5-20</b> |
| <b>Figure S19.</b> <sup>1</sup> H NMR spectrum of malonylated product <b>9a</b> in Methanol- <i>d</i> <sub>4</sub> .....          | <b>21</b>   |
| <b>Figure S20.</b> <sup>13</sup> C NMR spectrum of malonylated product <b>9a</b> in Methanol- <i>d</i> <sub>4</sub> .....         | <b>21</b>   |
| <b>Figure S21.</b> HSQC spectrum of malonylated product <b>9a</b> in Methanol- <i>d</i> <sub>4</sub> .....                        | <b>22</b>   |
| <b>Figure S22.</b> HMBC spectrum of malonylated product <b>9a</b> in Methanol- <i>d</i> <sub>4</sub> .....                        | <b>22</b>   |
| <b>Figure S23.</b> Heterogenous expression and purification of three targeted His6-tag fusion proteins after gene expression..... | <b>23</b>   |

|                |                                                                                    |     |
|----------------|------------------------------------------------------------------------------------|-----|
| NbMaT1         | ....MASVIEQCQVAFSPGS.AAELTLPLTYFDHWLIGFHRMRRILFYKLPFRSDFVQTIIEFLKYSLSLIDPKYVLEL    | 74  |
| NtMaT1         | ....MASVIEQCQVAFSPGS.ATELTLPLTYFDHWLIGFHRMRRILFYKLPFRSDFVQTIIEFLKYSLSLIDPKYVLEL    | 74  |
| Gs5AT          | MEQIQMVKVLEKQCVTPFFDTTDELVELVETFDIPWHLNMQSLLFYDFPFYKTFELDTVVENLRAKSLSLIDPKHYVLEL   | 80  |
| Sc3MaT         | MDSIPCLNILEHARISAPSGTIG.HRSLSLTFEFLIHWLEFPVHHLFFYDFPHSKSHFMDTIIVERLRCSLSVVILQHFFEF | 79  |
| Dm3MaT1        | MASNSVITILEQCRISPPGTIG.ERSLPLTFEFLIHWLEFPVHHLFFYDFPHSKSHFMDTIIVERLRCSLSVVILQHFFEF  | 79  |
| Pf5MaT         | ...MTITLLPTCRILEPPTD...EVSIPLSFEDMHWLHHPRLRLLFYDFHPCSKPCELDLAIVEHLKQSLSLIDPKHYVLEL | 73  |
| Consensus      | e fd w fy p f p lk sls l p                                                         |     |
| <b>motif 1</b> |                                                                                    |     |
| NbMaT1         | AGNVACQD...WTNYEELRY..VTGDSVSVIIFSPSDDLGNVYVGNHFRNAKDFYHFIPQLA.EPTDAPGFQLAEVLAIQ   | 148 |
| NtMaT1         | AGNVACQD...WSGYFELRY..VTGNSVSVIIFSPSDDDFNYLTCYHFRNTKDFYHFVQQLA.EPKDAPGFVQLAEVLAIQ  | 148 |
| Gs5AT          | SGNLLMFIK...SGKMEFRFYSRDEGDSITLIFAPSQCDEIDNRKCHQLVDSNDIHALFYVMPRVVIRTMQDYKVIPLVAVQ | 157 |
| Sc3MaT         | ASNLIVFPNIDGSGFNKKEIKHVEGDSVVVTFACCCLDENNLTGNHFRKCNENYPLVPSLG.NAIKRLCDGVTVELESLO   | 158 |
| Dm3MaT1        | ASNLIVSPNADDFGVIRKPEIRHVEGTYVALTFACCSLDENNLTGNHFRKCNENYPLVPPIG.NVVKMADCVTIIELESVQ  | 158 |
| Pf5MaT         | AGNLLYFS...SNTDQKPHLRCAVADSVPLTIAFSTTIDEDMLTGNHARDADQFYDFVAAMP.FIAEEFECCKIVVELESLO | 148 |
| Consensus      | n g e df l g p q                                                                   |     |
| <b>motif 1</b> |                                                                                    |     |
| NbMaT1         | VTLFFNHGHSIGFTNHHVAGDGIIVKFRRAWALLNKFNGDEQFLDRE..FIEFYDRSIVKDENGVGMILWDEMKKYKHM    | 226 |
| NtMaT1         | VTLFFNHGHSIGFTNHHVAGDGIIVKFRRAWALLNKFNGDEQFLANE..FIEFYDRSIVKDENGVGMISWENEMKKYKHM   | 226 |
| Gs5AT          | VTVFFNRGHAVALTAHHSIADAKSFVMEINAWAYINFGEDADLLSAN..LLESEDRSIVKDEYGLEETFWNEMQHVLEM    | 235 |
| Sc3MaT         | VTFEFGSGISLGMNHHSLGDASTRFNFKGWTISIQQSGVDRSELTGK..SPEVEDR.LLNIEHLDENKLRHTRLESFYK    | 235 |
| Dm3MaT1        | VTVFRDSGHSIGFTNHHSLGDASTRIGFLKVTSTIAFSGDQSLIMNG..SLEVLDR.LLDVFRKLDYRLRHTSLETFFYQ   | 235 |
| Pf5MaT         | VTLFFRGHICIGLSNHHCLGDARSVWGFVLAWASINFGGDEEFLSENGESLIEFDRSLKDELEIDITIFWKKVLRNIFLK   | 228 |
| Consensus      | vt f gi hh d f w d l p dr i p                                                      |     |
| <b>motif 2</b> |                                                                                    |     |
| NbMaT1         | MTMS.DIVIEPDPVRCFIVSRDDILKFNLIISRREN..LTHVTSFVITCAYVWWSCLIKSEAATG...EKIDENGVEFF    | 300 |
| NtMaT1         | MKMS.DVVEPDPVRCFIIITRHDIKRNVLVLRREK..LTHVTSFVITCAYVWTCIKSEAATG...EEIDENGVEFF       | 300 |
| Gs5AT          | FSRFGSKPRFRNFVRYTYVLSLAEIQKLNKVLNLRGSEPTIRVTFIVTCGYVWTCMVRSKDDVVSEESNDENELEBYF     | 315 |
| Sc3MaT         | PSSL...VGFTEPDRSTFVLRTRINLNRKRVLTQVEN..LEYMSEFVITCGYVWWSCLAKSLVKIG...ERKGEDELEPCF  | 307 |
| Dm3MaT1        | PSSL...VGFTEPDRSTFVLRTRINLNRKRVLTQIET..LEYISSFVITCGYVWWSCLAKSLVKMG...EKKGEDELEPCF  | 307 |
| Pf5MaT         | PSSF...PLETINVRTEVLSQSDIKRKLHANN....LVQFSSFVVAAYVWWSQVWVKSGD.....GGEANAFBLE        | 293 |
| Consensus      | vr t i k f v y w c ks e f                                                          |     |
| <b>motif 2</b> |                                                                                    |     |
| NbMaT1         | GFANDQRAQFNPELPPSYFGNALVGYVARTRHVDLAGKECFITAAELIGEAIQRMRKDEEWISGG..WFKKEYDKLDVKR   | 378 |
| NtMaT1         | GCANDQRAQFNPELPPSYFGNALVGYVARTRQVDLAGKECFITAAVELIGEAIQRMRKDEEWISGGS..WFKKEYDKVDAKR | 378 |
| Gs5AT          | SFTADQRGLLTPECFPNYFGNCLASQVAKATHKELVGNKELLVAVAIVVAIDRVRHNERGVADAKTWLSESNGPSKR      | 395 |
| Sc3MaT         | IIITIDRSRLDPEIETAYFGNCGAPCVPTLKNVVTISENGYALGAKVIGESICRMIYKNDGITRDAARWHPEF..MIFAR   | 385 |
| Dm3MaT1        | ICTDQRSRMPEPEIETAYFGNCGAPCVPTTIKNVVTISENGYVFAAKLIGEAINRMVKNKEGILRDAERWHDFA..KIFAR  | 385 |
| Pf5MaT         | VIFPDRGRGRTNPEVFNAYFGNCIVGVVKEVEHEKMAGNECFVIAAEAIIAGEIRKNKMNDKEEILRGAENWLSIWKCMGMS | 373 |
| Consensus      | d r pp p yfgn v g i i l w                                                          |     |
| <b>motif 3</b> |                                                                                    |     |
| NbMaT1         | SVSVAGSPKLDLNAADFQWGRKPKLEFVSDSGDSISMSLSKYKDSGDDEIFGLSLSKTRMNAFAAMFTEGISEIFL..     | 453 |
| NtMaT1         | SLSVAGSPKLDLNAADFQWGRKPKLEFVSDNDGDSISMSLSKSKDSGDDEIFGLSLSKTRMNAFAAMFTEGISEIFL..    | 453 |
| Gs5AT          | FLGITGSPKFDLSGVDFQWGRKPKKFLITSDYAELI..YVIQSRDFEKGVEIGVSLPKIEMDAFAKIFEEGFCFSLS.     | 469 |
| Sc3MaT         | KIGVACTPKLNLDFDFQWGRKPKKFLITSVDYNTS..ISINASKTSAQDDEIFGLSLESQMCEAFSSSIFDEGLESQVS    | 460 |
| Dm3MaT1        | KIGVACTPKLNLDFDFQWGRKPKKFLITSVDYNGS..VAINASKESTQDDEIFGLSLESNMCEAFADIFNFGLESEI.     | 459 |
| Pf5MaT         | VLGISGSPKFDLSNAADFQWGRKPKKLEFVSDGEEK...YTMSLCNSDCCGVEVGLSLPGERMNAFAAMFACGLAKLDS    | 446 |
| Consensus      | g pk dfgwg k s d e g m a f f g                                                     |     |

**Figure S1. Multiple alignment of the deduced amino acid sequence of NbMaT1 and related enzymes.**

Black shading shows the identical amino acids in at least four sequences. Motifs 1–3 are the region conserved among BAHD acyltransferases. Abbreviations and GenBank accession numbers are: NbMaT1 (KY563646); NtMaT1, *Nicotiana tabacum* phenolic glucoside-6'-*O*-malonyltransferase with broad substrate specificity (BAD93691); Gs5AT, hydroxycinnamoyl-CoA: anthocyanin 5-glucoside-6-*O*-hydroxycinnamoyltransferase from *Gentiana scabra* var. *buergeri* (BAD44688); Sc3MaT, malonyl-coenzyme A: anthocyanidin 3-*O*-glucoside-6"-*O*-malonyltransferase from *Pericallis cruenta* (AAO38058); Dm3MaT1, anthocyanidin 3-*O*-glucoside-6"-*O*-malonyltransferase from *Chrysanthemum x morifolium* (AAQ63615); Pf5MaT, anthocyanin 5-*O*-glucose 6'''-*O*-malonyltransferases from *Salvia splendens* (AAL50565).

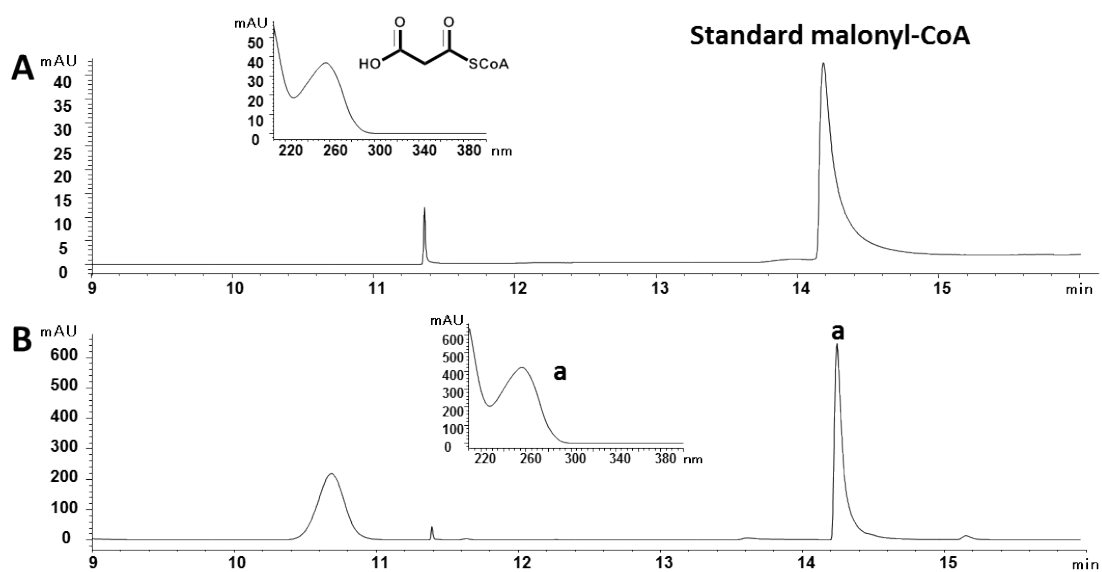

**Figure S2. HPLC-UV spectra of standard malonyl-CoA (A) and enzymatic synthesis of malonyl-CoA by MatB (B).**

**A:**

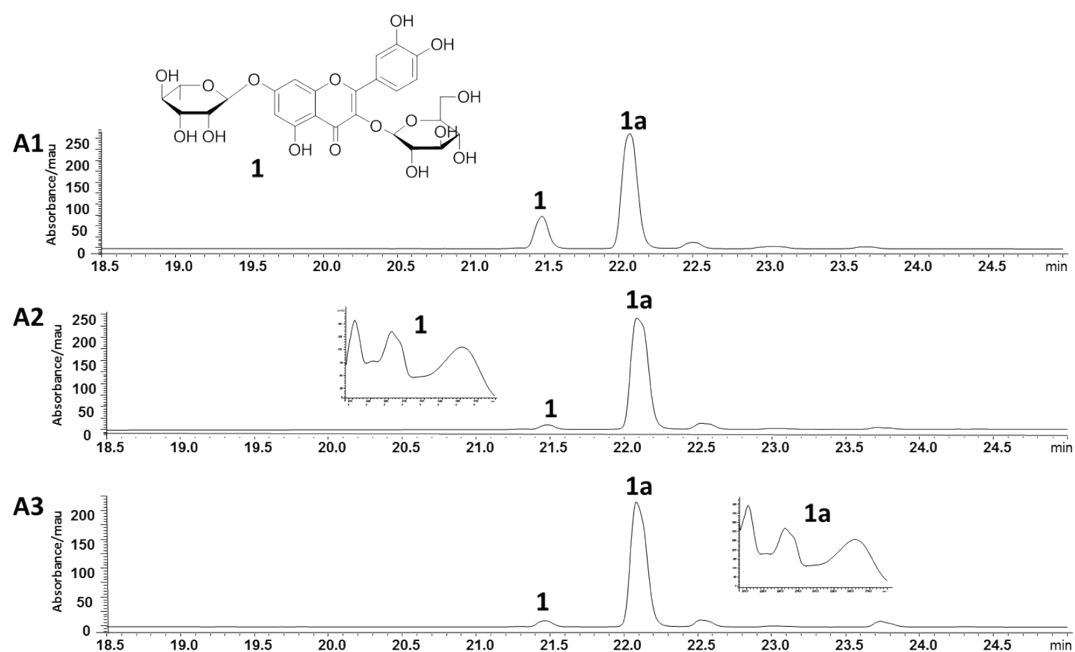

**B:**

| Rank | Score | Formula (M)                                     | Ion                | Meas. m/z | Pred. m/z | Df. (mDa) | Df. (ppm) | Iso  | DBE  |
|------|-------|-------------------------------------------------|--------------------|-----------|-----------|-----------|-----------|------|------|
| 1    | 0.00  | C <sub>30</sub> H <sub>32</sub> O <sub>19</sub> | [M-H] <sup>-</sup> | 695.1426  | 695.1465  | -3.9      | -5.61     | 0.00 | 15.0 |

Inten.(x100,000)

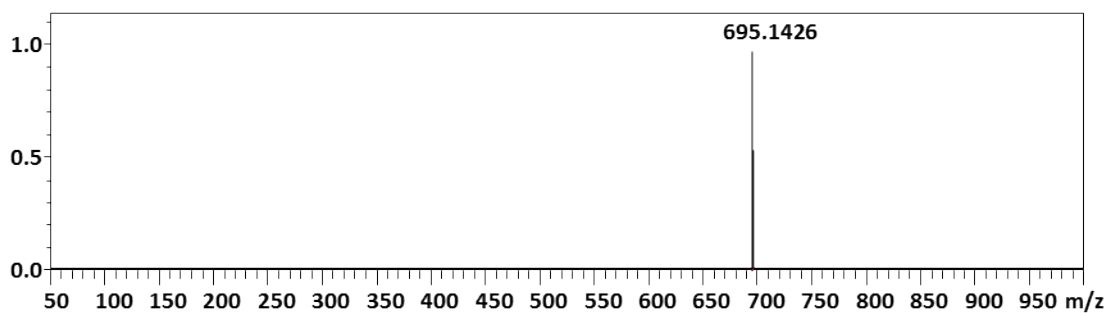

**Figure S3. HPLC-UV/HR-ESI-MS (negative) spectra of malonylated product of **1**.**

**A:** HPLC chromatogram and UV spectra of **1** and malonylated product **1a** catalysed by NbMaT1 (A1), one-pot reaction system (A2), fusion protein of MatB-NbMaT1 (A3); **B:** HR-ESI-MS (negative) spectrum of **1a**.

**A:**

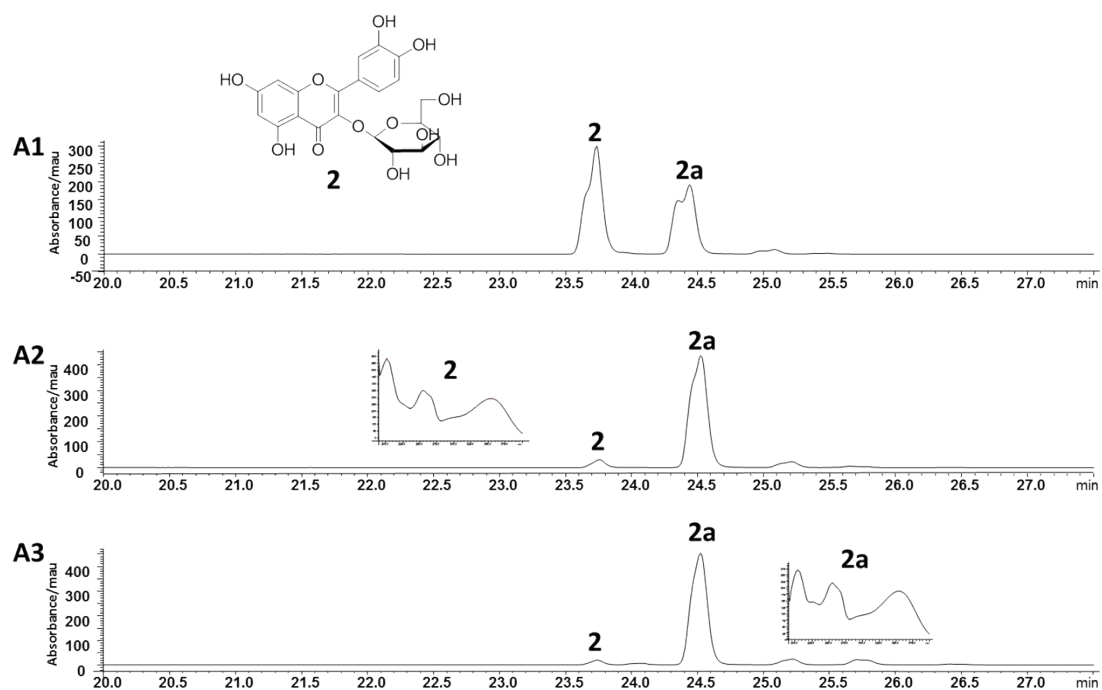

**B:**

| Rank | Score | Formula (M)                                     | Ion                | Meas. m/z | Pred. m/z | Df. (mDe) | Df. (ppm) | Iso  | DBE  |
|------|-------|-------------------------------------------------|--------------------|-----------|-----------|-----------|-----------|------|------|
| 1    | 0.00  | C <sub>24</sub> H <sub>22</sub> O <sub>15</sub> | [M+H] <sup>+</sup> | 551.1027  | 551.1031  | -0.4      | -0.73     | 0.00 | 14.0 |

Inten.(x10,000)

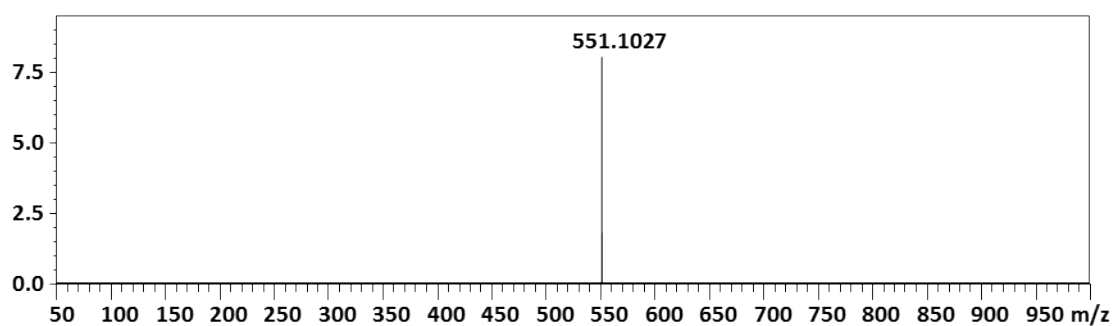

**Figure S4. HPLC-UV/HR-ESI-MS (positive) spectra of malonylated product of **2**.**

**A:** HPLC chromatogram and UV spectra of **2** and malonylated product **2a** catalysed by NbMaT1 (A1), one-pot reaction system (A2), fusion protein of MatB-NbMaT1 (A3); **B:** HR-ESI-MS (positive) spectrum of **2a**.

**A:**

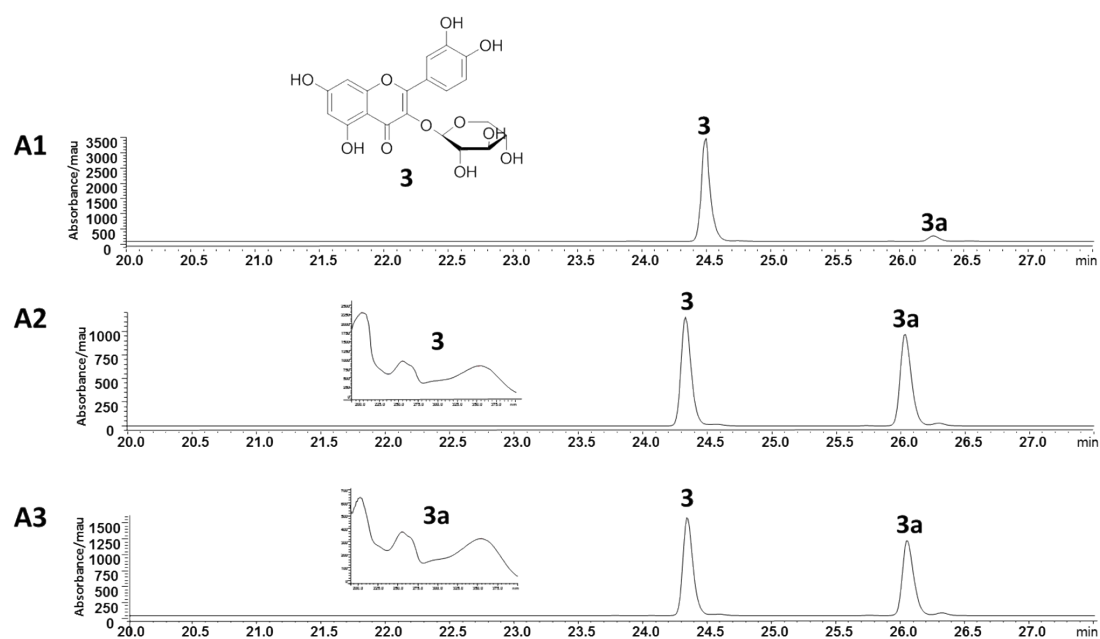

**B:**

| Rank | Score | Formula (M)                                     | Ion                | Meas. m/z | Pred. m/z | Df. (mDa) | Df. (ppm) | Iso  | DBE  |
|------|-------|-------------------------------------------------|--------------------|-----------|-----------|-----------|-----------|------|------|
| 1    | 0.00  | C <sub>23</sub> H <sub>20</sub> O <sub>14</sub> | [M+H] <sup>+</sup> | 521.0897  | 521.0926  | -2.9      | -5.57     | 0.00 | 14.0 |

Inten.(x100,000)

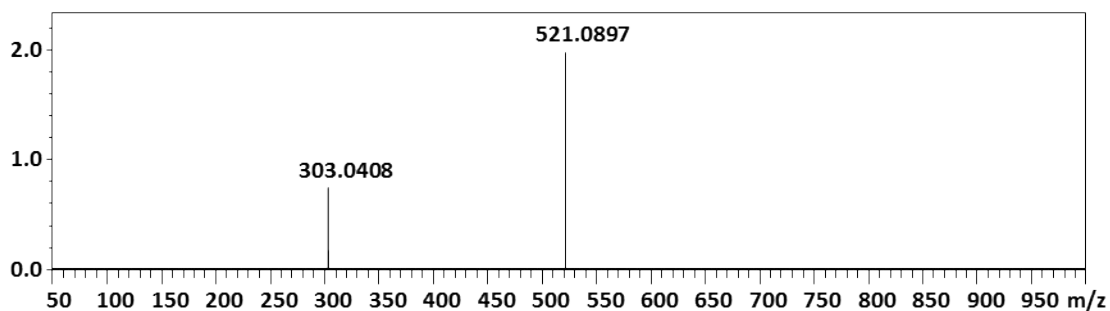

**Figure S5. HPLC-UV/HR-ESI-MS (positive) spectra of malonylated product of **3**.**

A: HPLC chromatogram and UV spectra of **3** and malonylated product **3a** catalysed by NbMaT1 (A1), one-pot reaction system (A2), fusion protein of MatB-NbMaT1 (A3); B: HR-ESI-MS (positive) spectrum of **3a**.

**A:**

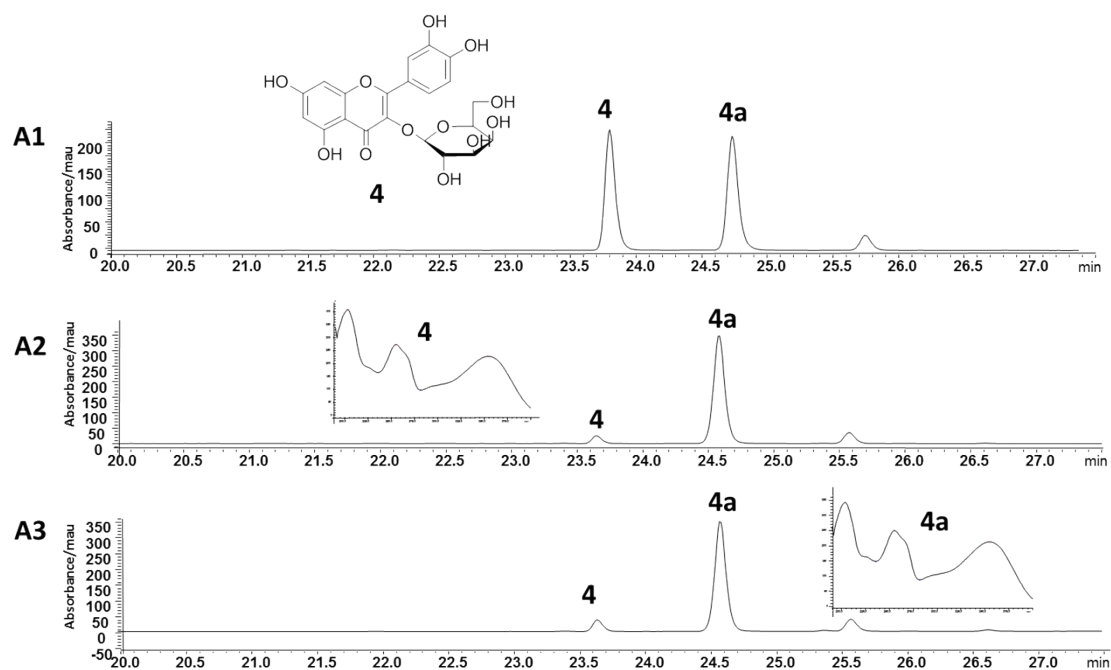

**B:**

| Rank | Score | Formula (M)                                     | Ion                | Meas. m/z | Pred. m/z | Df. (mDa) | Df. (ppm) | Iso  | DBE  |
|------|-------|-------------------------------------------------|--------------------|-----------|-----------|-----------|-----------|------|------|
| 1    | 0.00  | C <sub>24</sub> H <sub>22</sub> O <sub>15</sub> | [M-H] <sup>-</sup> | 549.0853  | 549.0886  | -3.3      | -6.01     | 0.00 | 14.0 |

Inten.(x100,000)

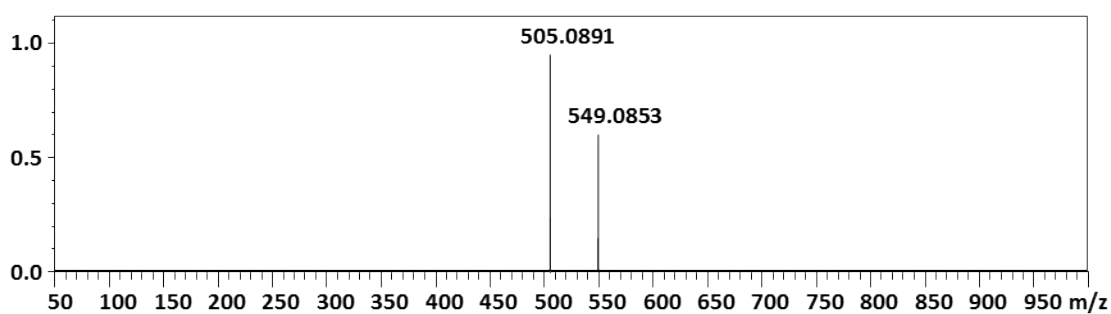

**Figure S6. HPLC-UV/HR-ESI-MS (negative) spectra of malonylated product of 4.**

**A:** HPLC chromatogram and UV spectra of 4 and malonylated product 4a catalysed by NbMaT1 (A1), one-pot reaction system (A2), fusion protein of MatB-NbMaT1 (A3); **B:** HR-ESI-MS (negative) spectrum of 4a.



**A:**

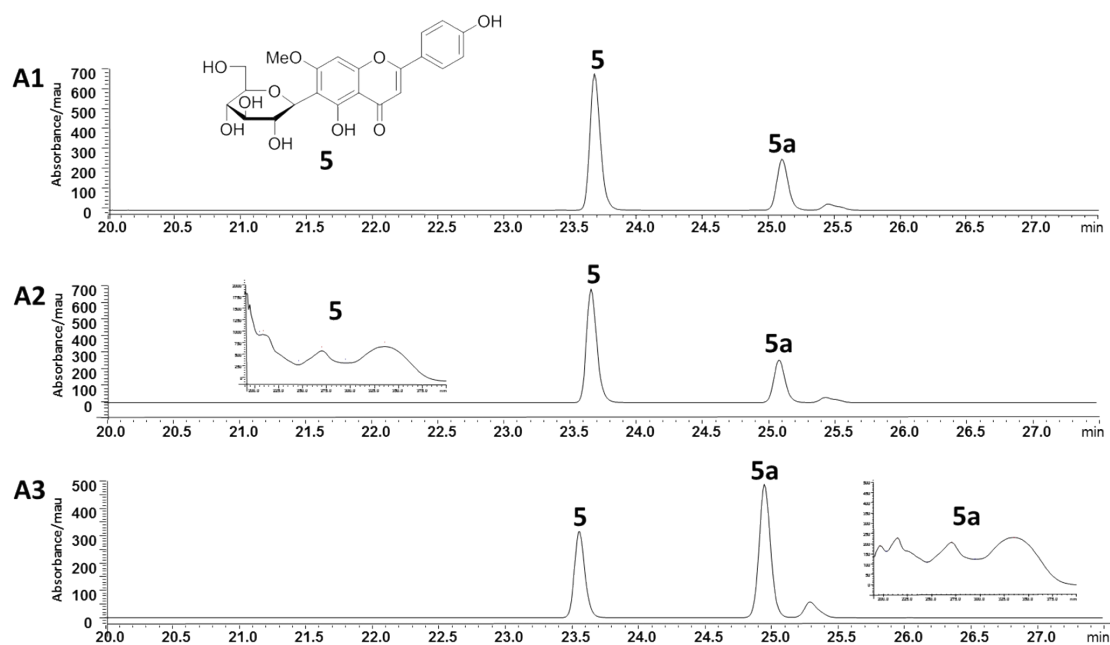

**B:**

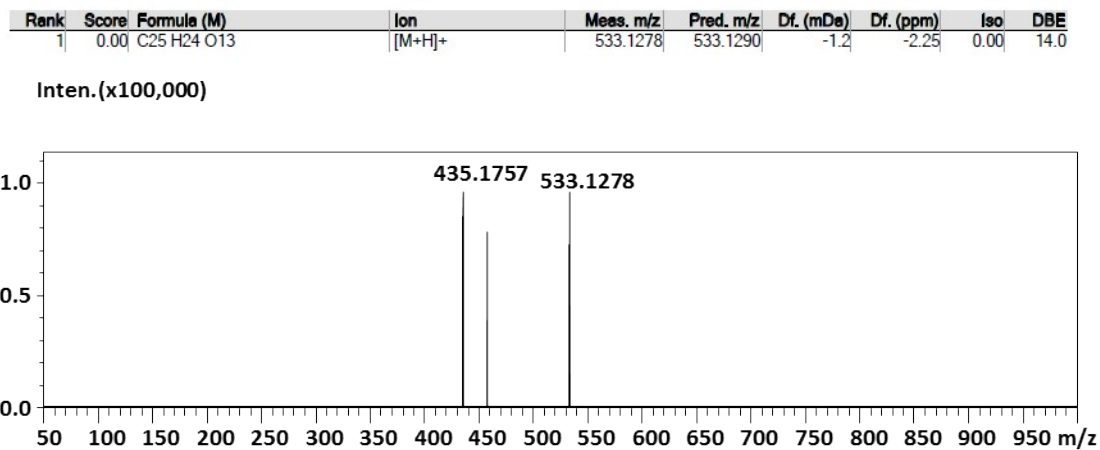

**Figure S7. HPLC-UV/HR-ESI-MS (positive) spectra of malonylated product of **5**.**

**A:** HPLC chromatogram and UV spectra of **5** and malonylated product **5a** catalysed by NbMaT1 (A1), one-pot reaction system (A2), fusion protein of MatB-NbMaT1 (A3); **B:** HR-ESI-MS (positive) spectrum of **5a**.

**A:**

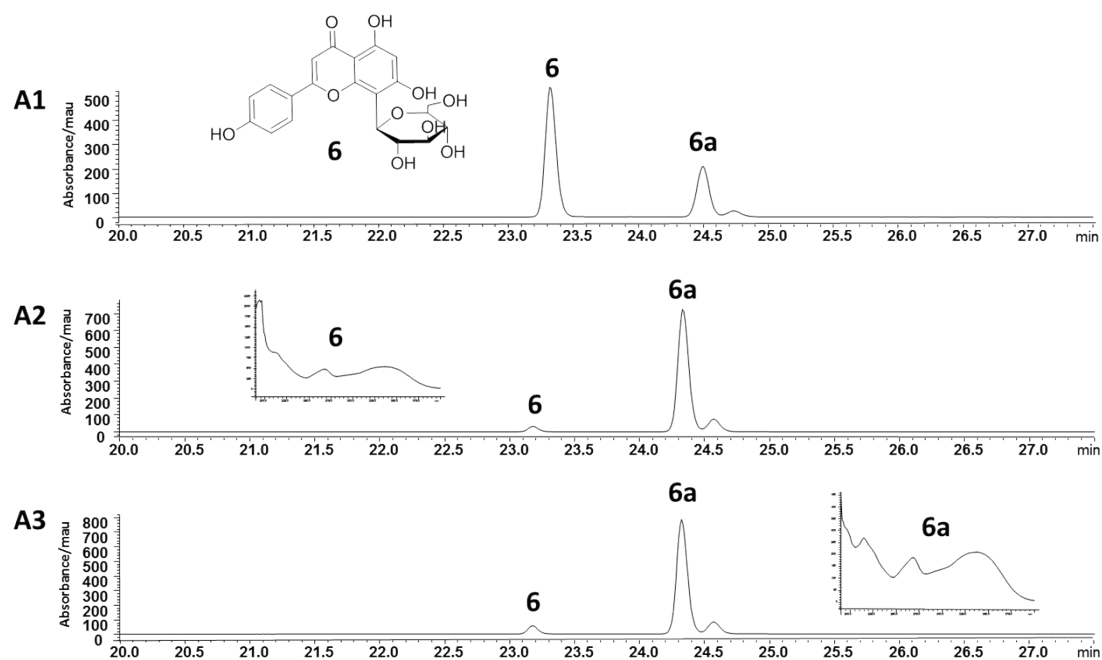

**B:**

| Rank | Score | Formula (M)                                     | Ion                | Meas. m/z | Pred. m/z | Df. (mDa) | Df. (ppm) | Iso  | DBE  |
|------|-------|-------------------------------------------------|--------------------|-----------|-----------|-----------|-----------|------|------|
| 1    | 0.00  | C <sub>24</sub> H <sub>22</sub> O <sub>13</sub> | [M+H] <sup>+</sup> | 519.1127  | 519.1133  | -0.6      | -1.16     | 0.00 | 14.0 |

Inten. (x10,000)

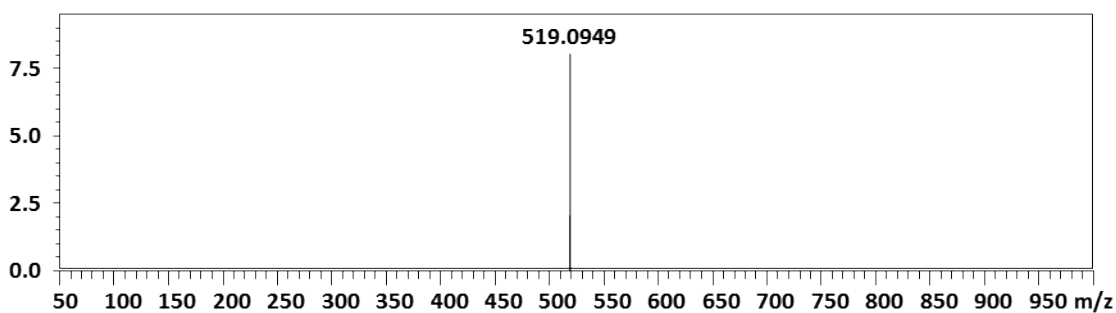

**Figure S8. HPLC-UV/HR-ESI-MS (positive) spectra of malonylated product of **6**.**

**A:** HPLC chromatogram and UV spectra of **6** and malonylated product **6a** catalysed by NbMaT1 (A1), one-pot reaction system (A2), fusion protein of MatB-NbMaT1 (A3); **B:** HR-ESI-MS (positive) spectrum of **6a**.

**A:**

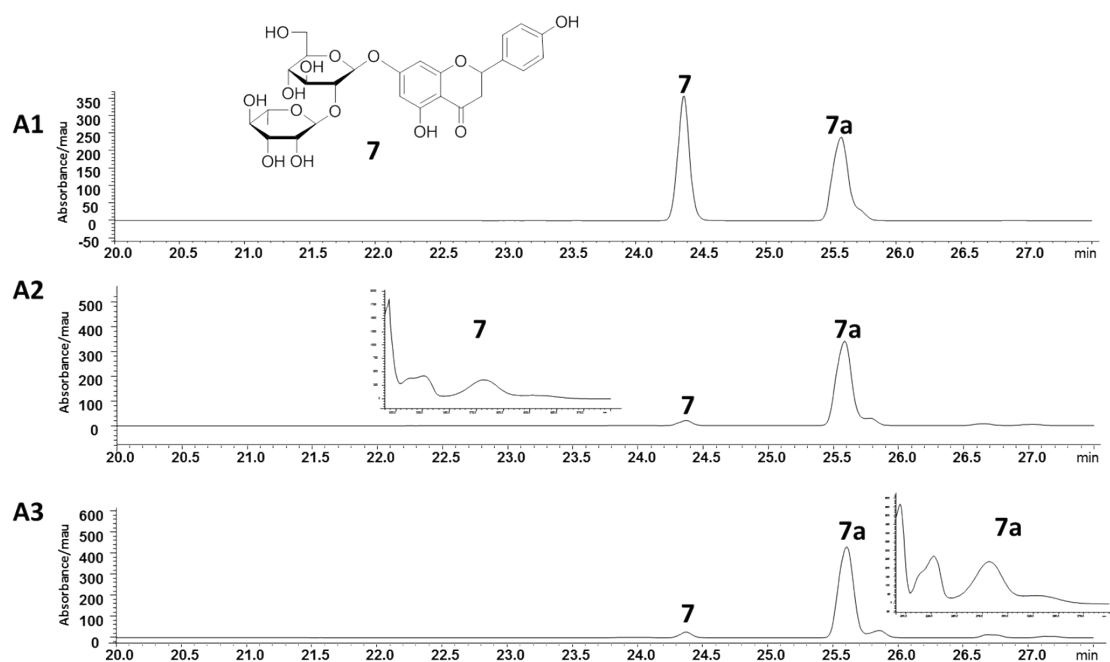

**B:**

| Rank | Score | Formula (M)                                     | Ion                | Meas. m/z | Pred. m/z | Df. (mDa) | Df. (ppm) | Iso  | DBE  |
|------|-------|-------------------------------------------------|--------------------|-----------|-----------|-----------|-----------|------|------|
| 1    | 0.00  | C <sub>30</sub> H <sub>34</sub> O <sub>17</sub> | [M-H] <sup>-</sup> | 665.1774  | 665.1723  | 5.1       | 7.67      | 0.00 | 14.0 |

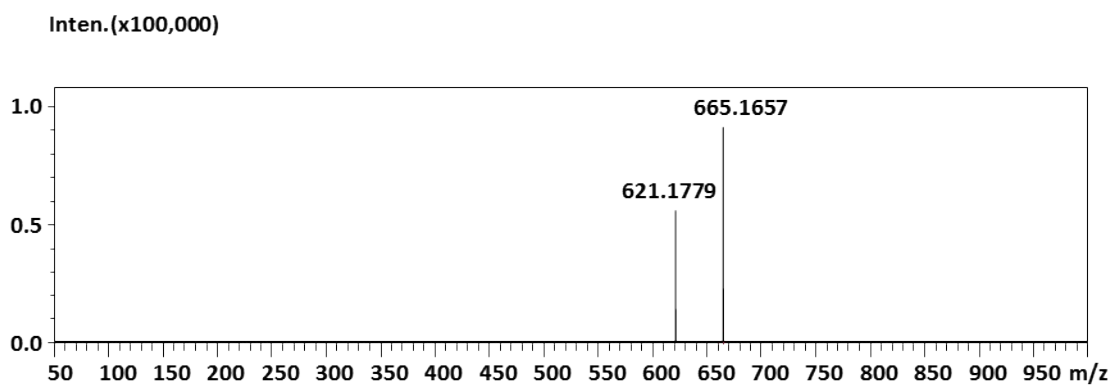

**Figure S9. HPLC-UV/HR-ESI-MS (negative) spectra of malonylated product of 7.**

**A:** HPLC chromatogram and UV spectra of 7 and malonylated product 7a catalysed by NbMaT1 (A1), one-pot reaction system (A2), fusion protein of MatB-NbMaT1 (A3); **B:** HR-ESI-MS (negative) spectrum of 7a.

**A:**

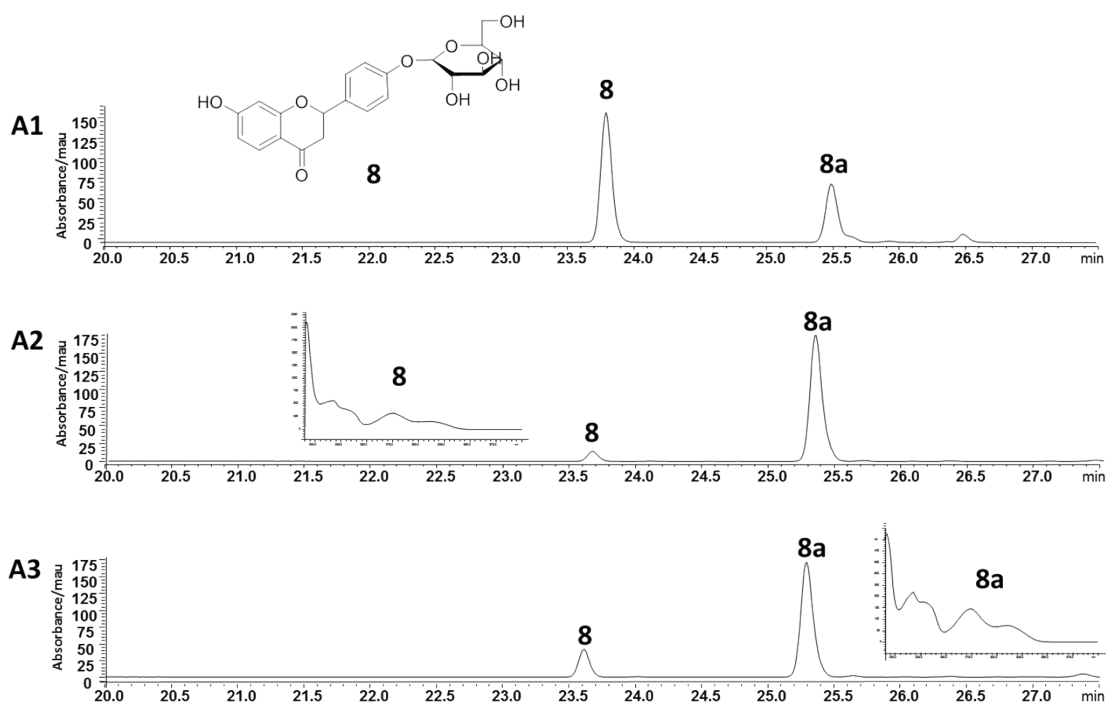

**B:**

| Rank | Score | Formula (M)                                     | Ion                | Mees. m/z | Pred. m/z | Df. (mDa) | Df. (ppm) | Iso   | DBE  |
|------|-------|-------------------------------------------------|--------------------|-----------|-----------|-----------|-----------|-------|------|
| 1    | 28.56 | C <sub>24</sub> H <sub>24</sub> O <sub>12</sub> | [M+H] <sup>+</sup> | 505.1295  | 505.1341  | -4.6      | -9.11     | 58.41 | 13.0 |

Inten.(x100,000)

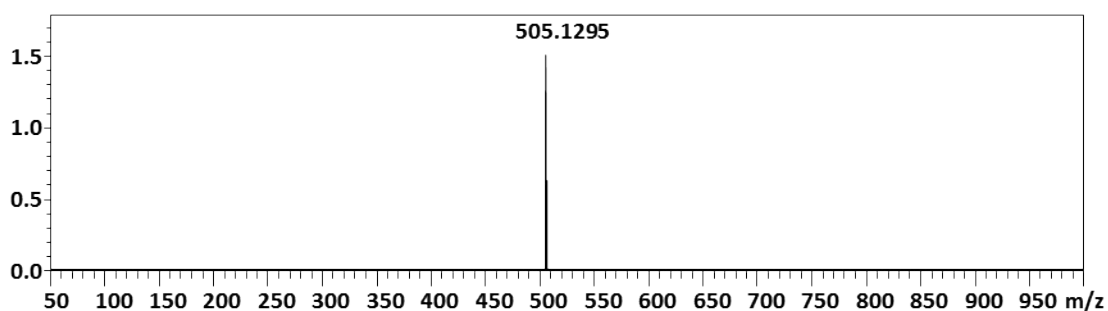

**Figure S10. HPLC-UV/HR-ESI-MS (positive) spectra of malonylated product of **8**.**

**A:** HPLC chromatogram and UV spectra of **8** and malonylated product **8a** catalysed by NbMaT1 (A1), one-pot reaction system (A2), fusion protein of MatB-NbMaT1 (A3); **B:** HR-ESI-MS (positive) spectrum of **8a**.

**A:**

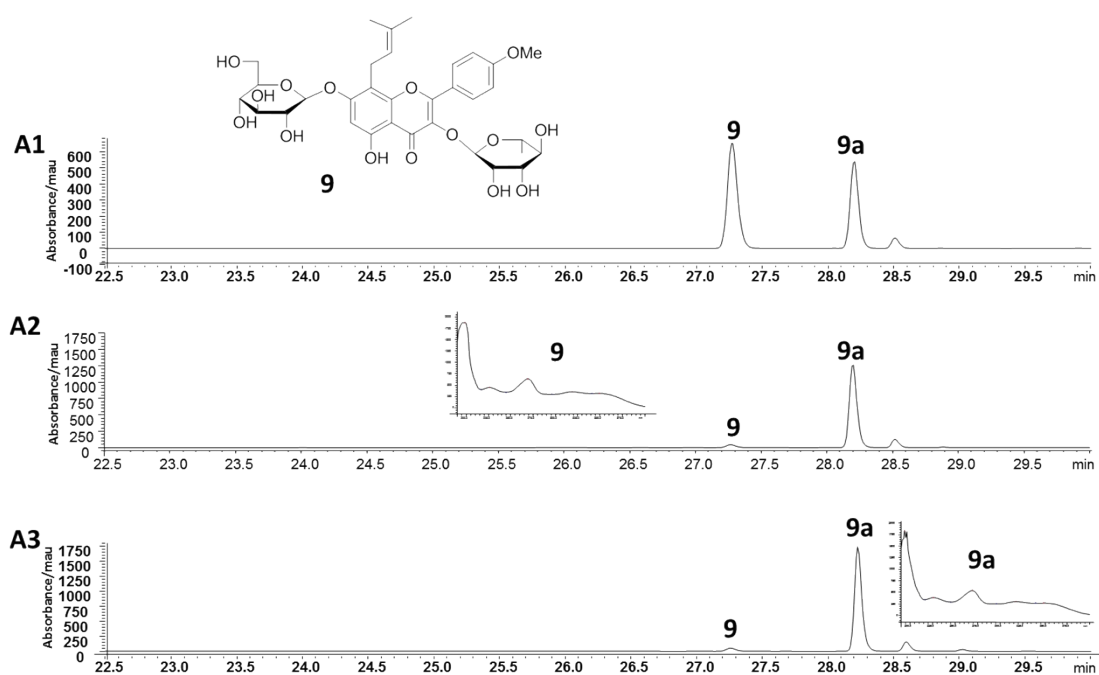

**B:**

| Rank | Score | Formula (M)                                     | Ion                | Meas. m/z | Pred. m/z | Df. (mDa) | Df. (ppm) | Iso   | DBE  |
|------|-------|-------------------------------------------------|--------------------|-----------|-----------|-----------|-----------|-------|------|
| 1    | 25.84 | C <sub>36</sub> H <sub>42</sub> O <sub>18</sub> | [M-H] <sup>-</sup> | 761.2299  | 761.2298  | 0.1       | 0.13      | 25.84 | 16.0 |

Inten. (x100,000)

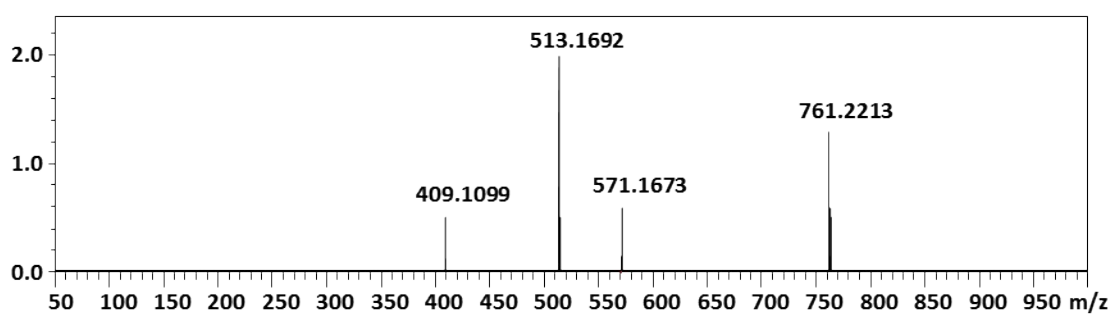

**Figure S11. HPLC-UV/HR-ESI-MS (negative) spectra of malonylated product of **9**.**

**A:** HPLC chromatogram and UV spectra of **9** and malonylated product **9a** catalysed by NbMaT1 (A1), one-pot reaction system (A2), fusion protein of MatB-NbMaT1 (A3); **B:** HR-ESI-MS (negative) spectrum of **9a**.

**A:**

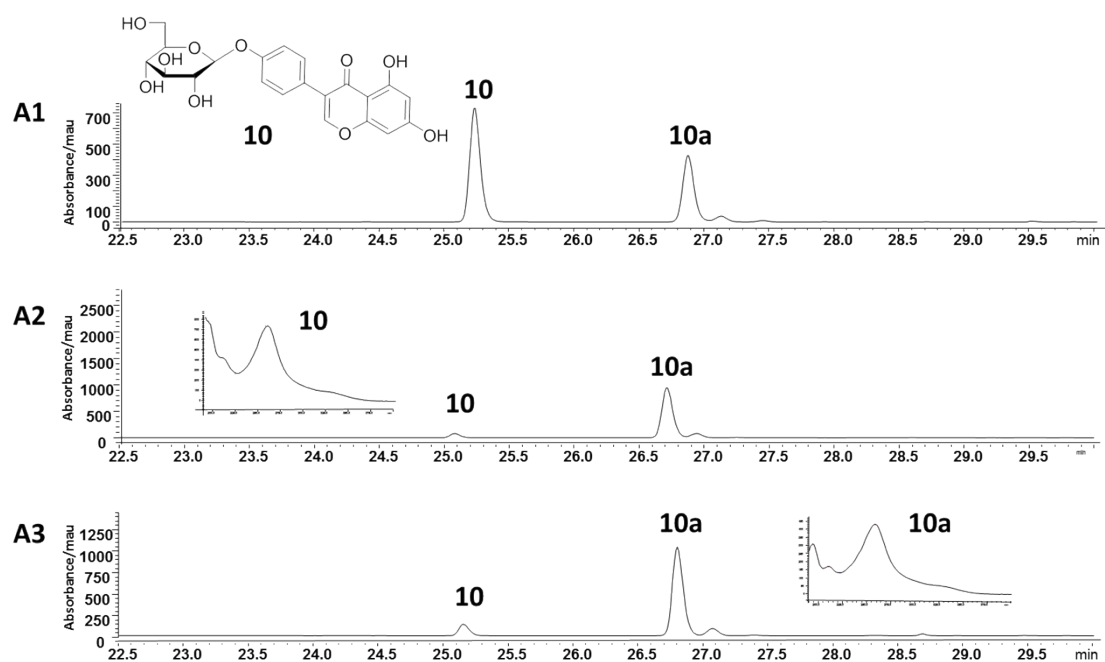

**B:**

| Rank | Score | Formula (M)                                     | Ion                | Meas. m/z | Pred. m/z | Df. (mDa) | Df. (ppm) | Iso  | DBE  |
|------|-------|-------------------------------------------------|--------------------|-----------|-----------|-----------|-----------|------|------|
| 1    | 0.00  | C <sub>24</sub> H <sub>22</sub> O <sub>13</sub> | [M-H] <sup>-</sup> | 517.0968  | 517.0988  | -2.0      | -3.87     | 0.00 | 14.0 |

Inten.(x100,000)

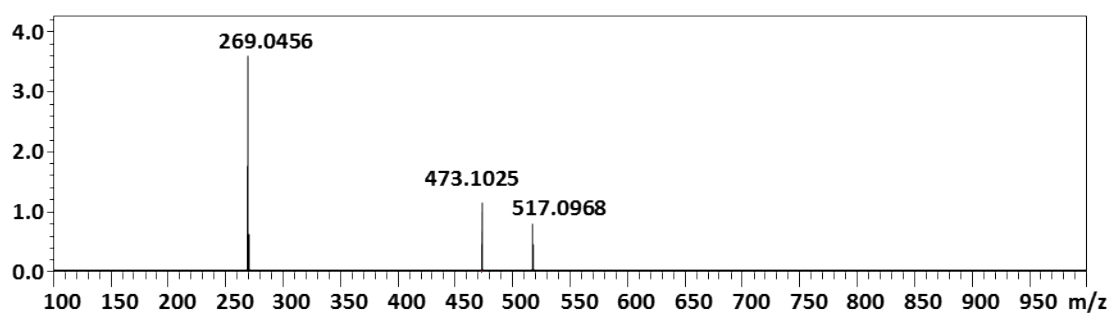

**Figure S12. HPLC-UV/HR-ESI-MS (negative) spectra of malonylated product of 10.**

**A:** HPLC chromatogram and UV spectra of **10** and malonylated product **10a** catalysed by NbMaT1 (A1), one-pot reaction system (A2), fusion protein of MatB-NbMaT1 (A3); **B:** HR-ESI-MS (negative) spectrum of **10a**.

**A:**

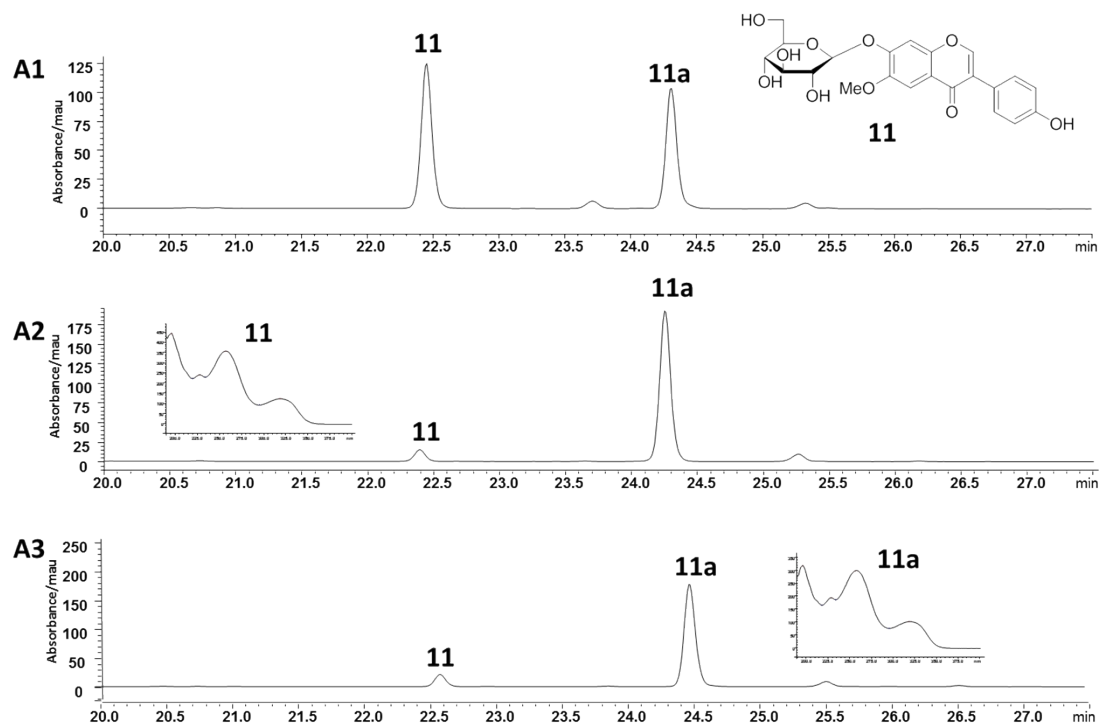

**B:**

| Rank | Score | Formula (M)                                     | Ion                | Meas. m/z | Pred. m/z | Df. (mDa) | Df. (ppm) | Iso  | DBE  |
|------|-------|-------------------------------------------------|--------------------|-----------|-----------|-----------|-----------|------|------|
| 1    | 0.00  | C <sub>25</sub> H <sub>24</sub> O <sub>13</sub> | [M+H] <sup>+</sup> | 533.1286  | 533.1290  | -0.4      | -0.75     | 0.00 | 14.0 |

Inten. (x100,000)

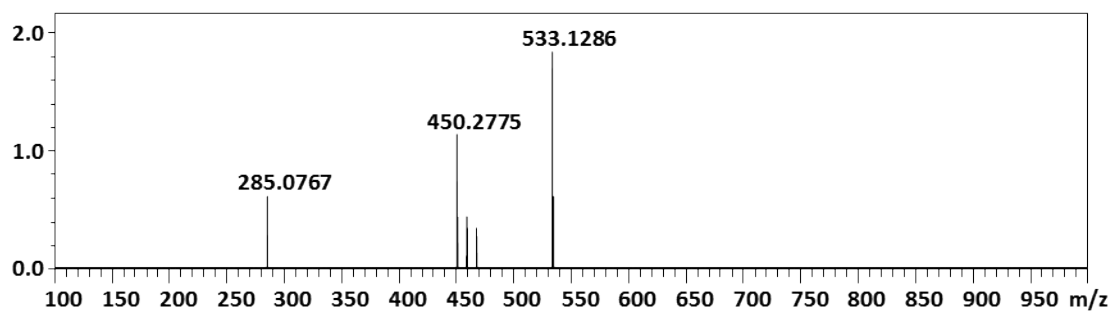

**Figure S13. HPLC-UV/HR-ESI-MS (positive) spectra of malonylated product of **11**.**

**A:** HPLC chromatogram and UV spectra of **11** and malonylated product **11a** catalysed by NbMaT1 (A1), one-pot reaction system (A2), fusion protein of MatB-NbMaT1 (A3); **B:** HR-ESI-MS (positive) spectrum of **11a**.

**A:**

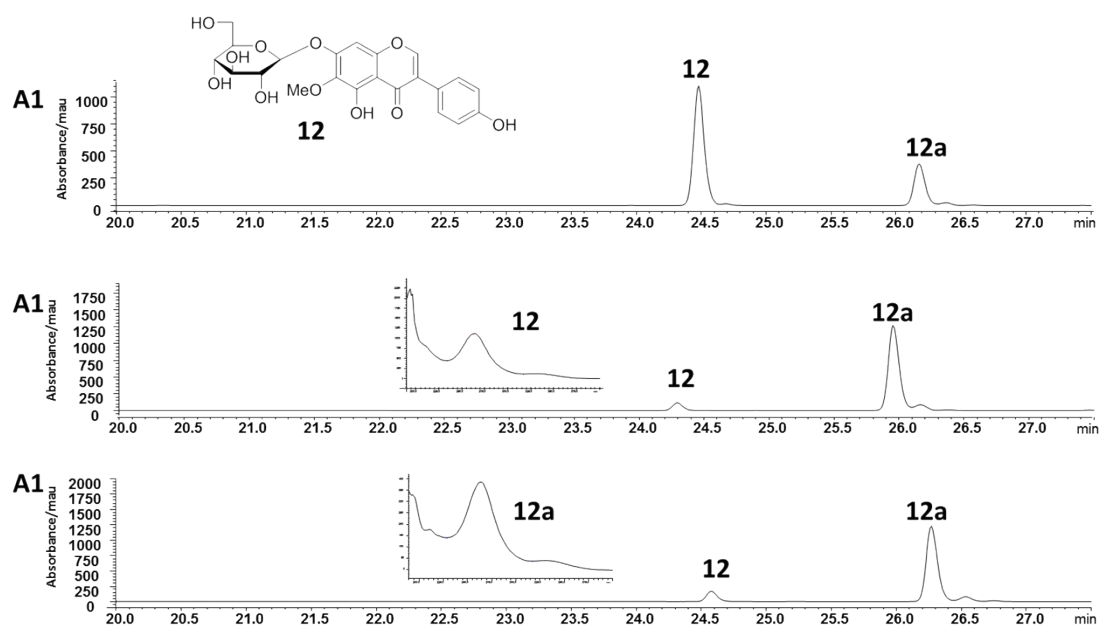

**B:**

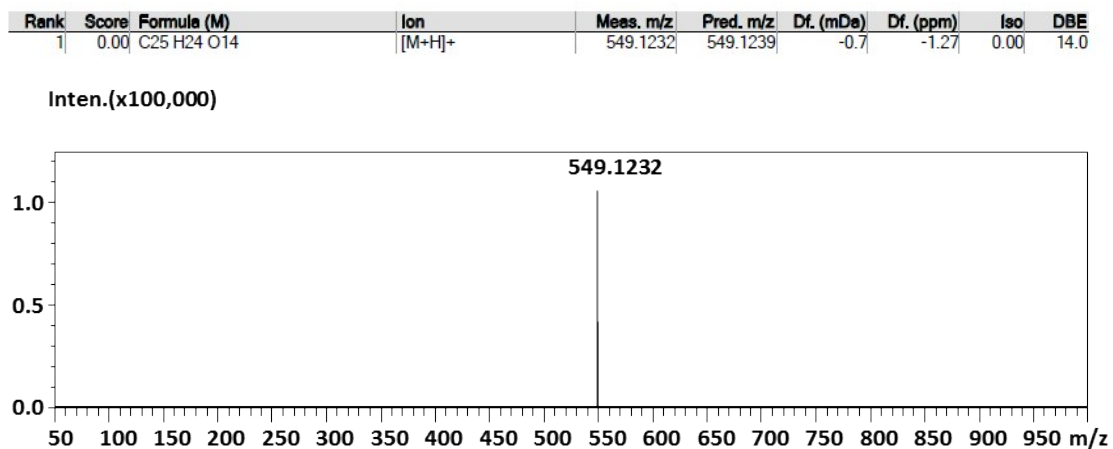

**Figure S14. HPLC-UV/HR-ESI-MS (positive) spectra of malonylated product of 12.**

A: HPLC chromatogram and UV spectra of 12 and malonylated product 12a catalysed by NbMaT1 (A1), one-pot reaction system (A2), fusion protein of MatB-NbMaT1 (A3); B: HR-ESI-MS (positive) spectrum of 12a.



**A:**

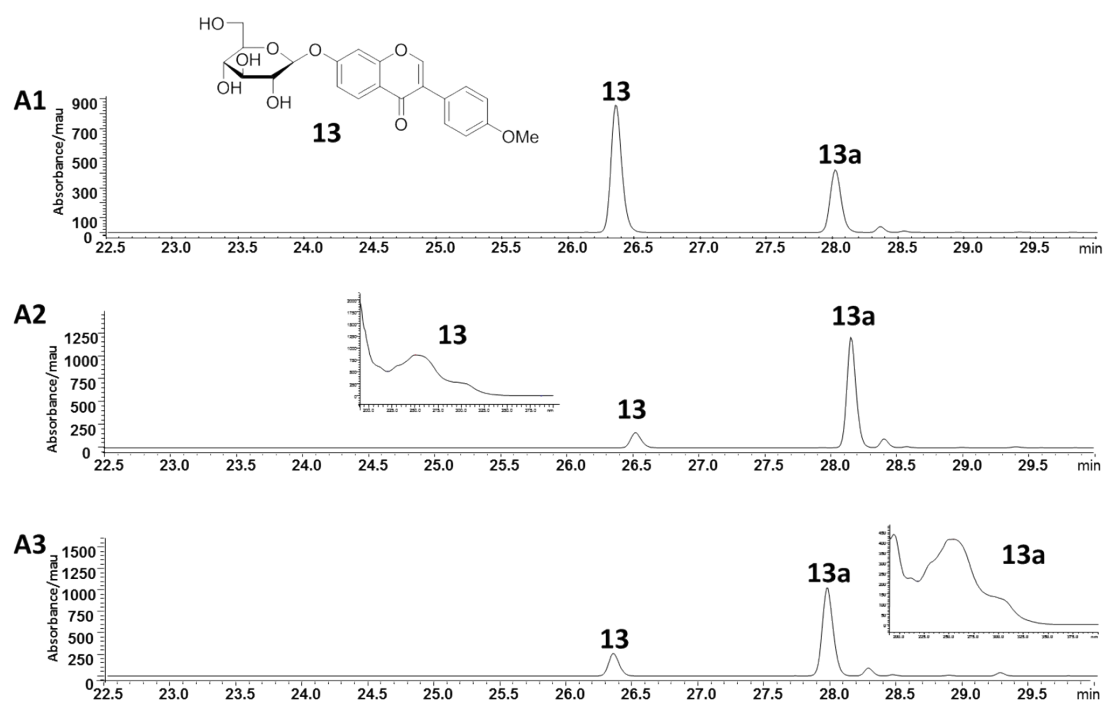

**B:**

| Rank | Score | Formula (M)                                     | Ion                | Mess. m/z | Pred. m/z | Df. (mDa) | Df. (ppm) | Iso  | DBE  |
|------|-------|-------------------------------------------------|--------------------|-----------|-----------|-----------|-----------|------|------|
| 1    | 0.00  | C <sub>25</sub> H <sub>24</sub> O <sub>12</sub> | [M+H] <sup>+</sup> | 517.1341  | 517.1341  | 0.0       | 0.00      | 0.00 | 14.0 |

Inten. (x100,000)

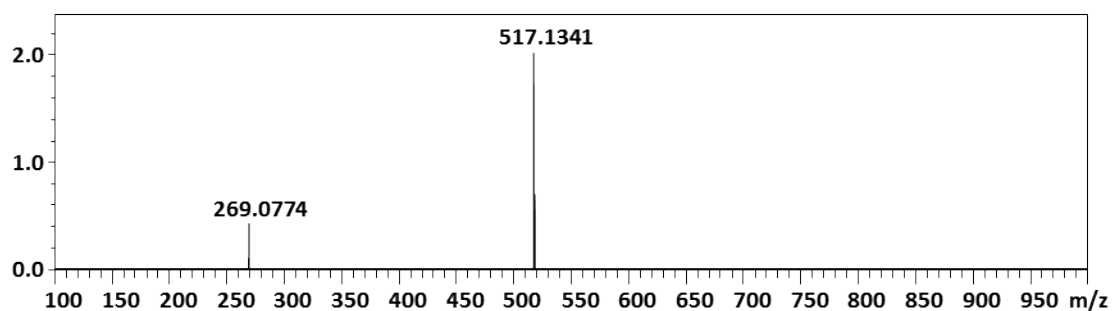

**Figure S15. HPLC-UV/HR-ESI-MS (positive) spectra of malonylated product of **13**.**

**A:** HPLC chromatogram and UV spectra of **13** and malonylated product **13a** catalysed by NbMaT1 (A1), one-pot reaction system (A2), fusion protein of MatB-NbMaT1 (A3); **B:** HR-ESI-MS (positive) spectrum of **13a**.

**A:**

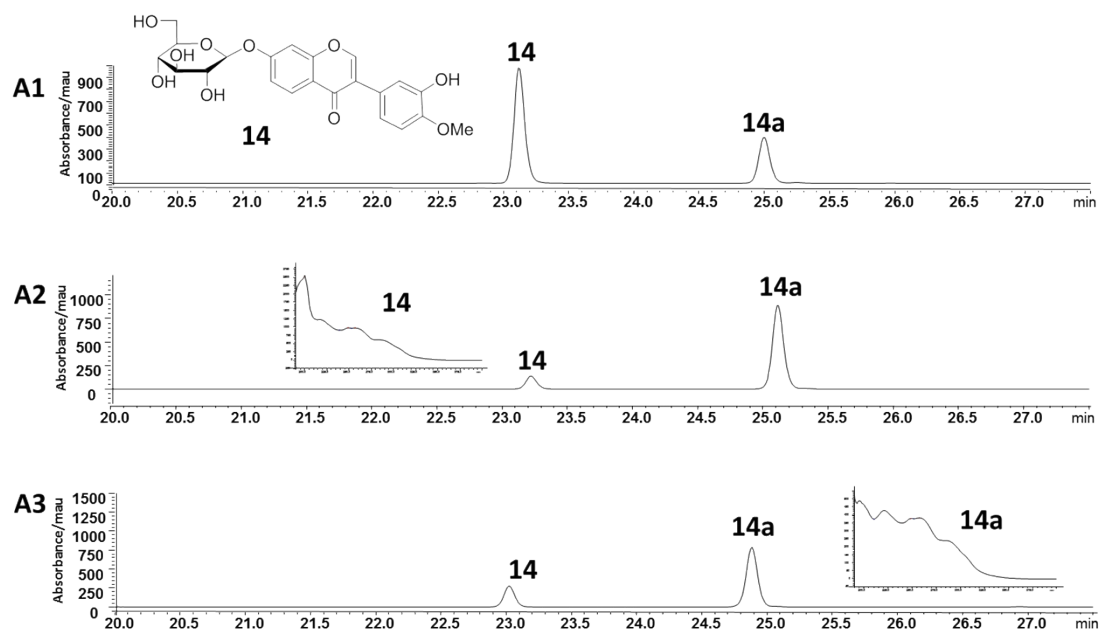

**B:**

| Rank | Score | Formula (M)                                     | Ion                | Meas. m/z | Pred. m/z | Df. (mDe) | Df. (ppm) | Iso  | DBE  |
|------|-------|-------------------------------------------------|--------------------|-----------|-----------|-----------|-----------|------|------|
| 1    | 0.00  | C <sub>25</sub> H <sub>24</sub> O <sub>13</sub> | [M+H] <sup>+</sup> | 533.1296  | 533.1290  | 0.6       | 1.13      | 0.00 | 14.0 |

Inten. (x100,000)

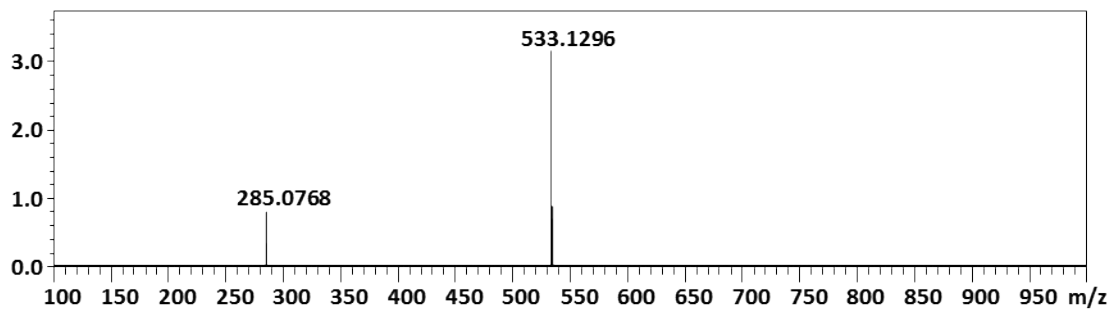

**Figure S16. HPLC-UV/HR-ESI-MS (positive) spectra of malonylated product of **14**.**

**A:** HPLC chromatogram and UV spectra of **14** and malonylated product **14a** catalysed by NbMaT1 (A1), one-pot reaction system (A2), fusion protein of MatB-NbMaT1 (A3); **B:** HR-ESI-MS (positive) spectrum of **14a**.

**A:**

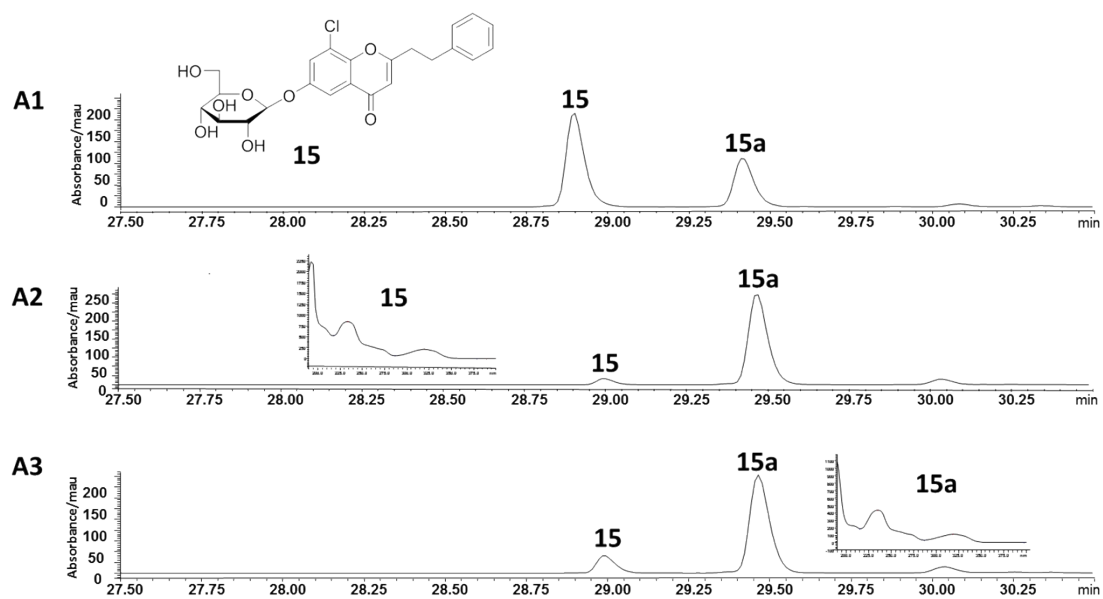

**B:**

| Rank | Score | Formula (M)                                        | Ion                | Meas. m/z | Pred. m/z | Df. (mDa) | Df. (ppm) | Iso  | DBE  |
|------|-------|----------------------------------------------------|--------------------|-----------|-----------|-----------|-----------|------|------|
| 1    | 0.00  | C <sub>26</sub> H <sub>25</sub> O <sub>11</sub> Cl | [M+H] <sup>+</sup> | 549.1126  | 549.1158  | -3.2      | -5.83     | 0.00 | 14.0 |

Inten.(x100,000)

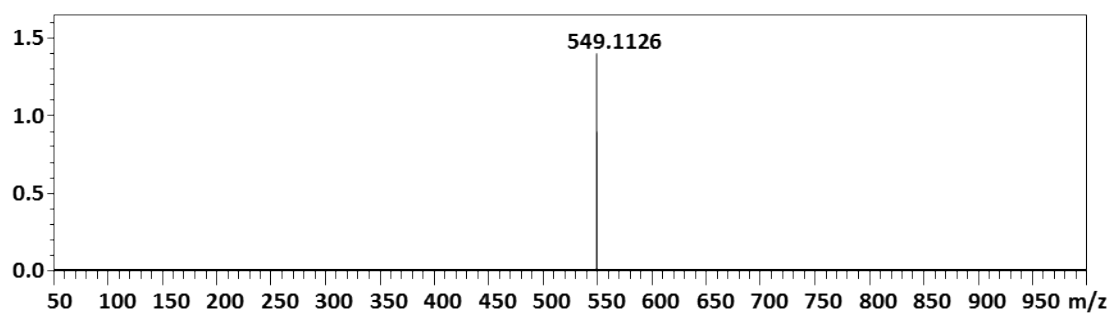

**Figure S17. HPLC-UV/HR-ESI-MS (positive) spectra of malonylated product of **15**.**

**A:** HPLC chromatogram and UV spectra of **15** and malonylated product **15a** catalysed by NbMaT1 (A1), one-pot reaction system (A2), fusion protein of MatB-NbMaT1 (A3); **B:** HR-ESI-MS (positive) spectrum of **15a**.

**A:**

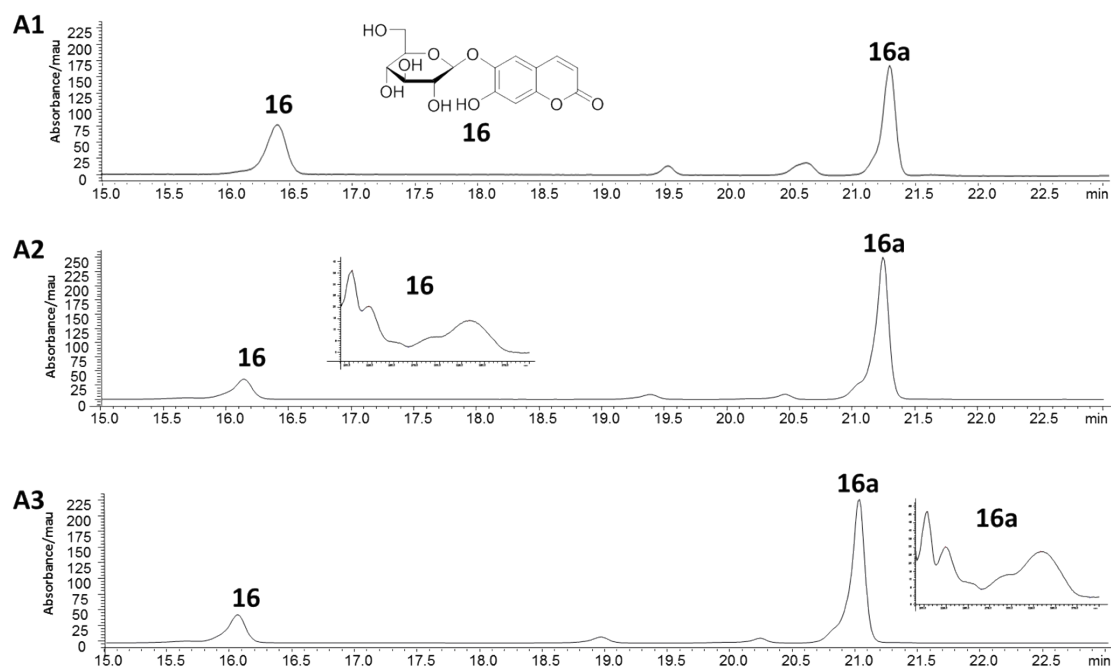

**B:**

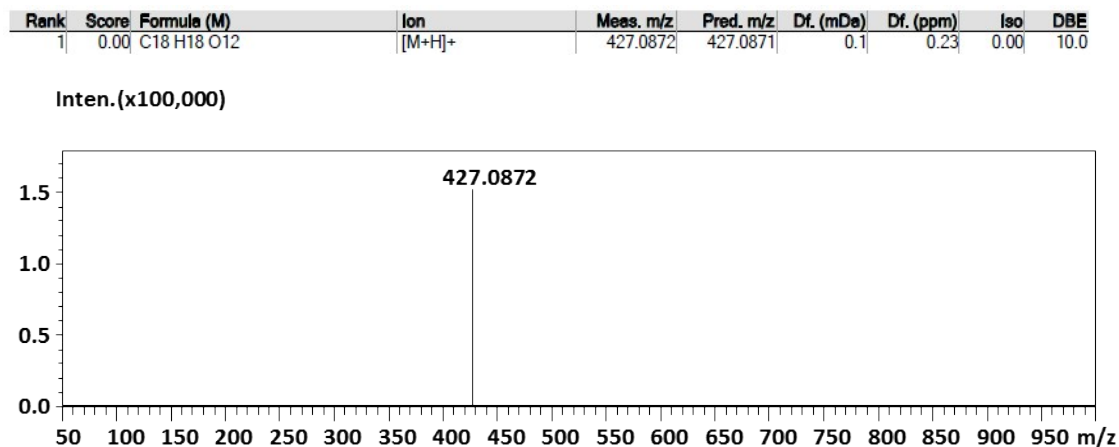

**Figure S18. HPLC-UV/HR-ESI-MS (positive) spectra of malonylated product of **16**.**

**A:** HPLC chromatogram and UV spectra of **16** and malonylated product **16a** catalysed by NbMaT1 (A1), one-pot reaction system (A2), fusion protein of MatB-NbMaT1 (A3); **B:** HR-ESI-MS (positive) spectrum of **16a**.

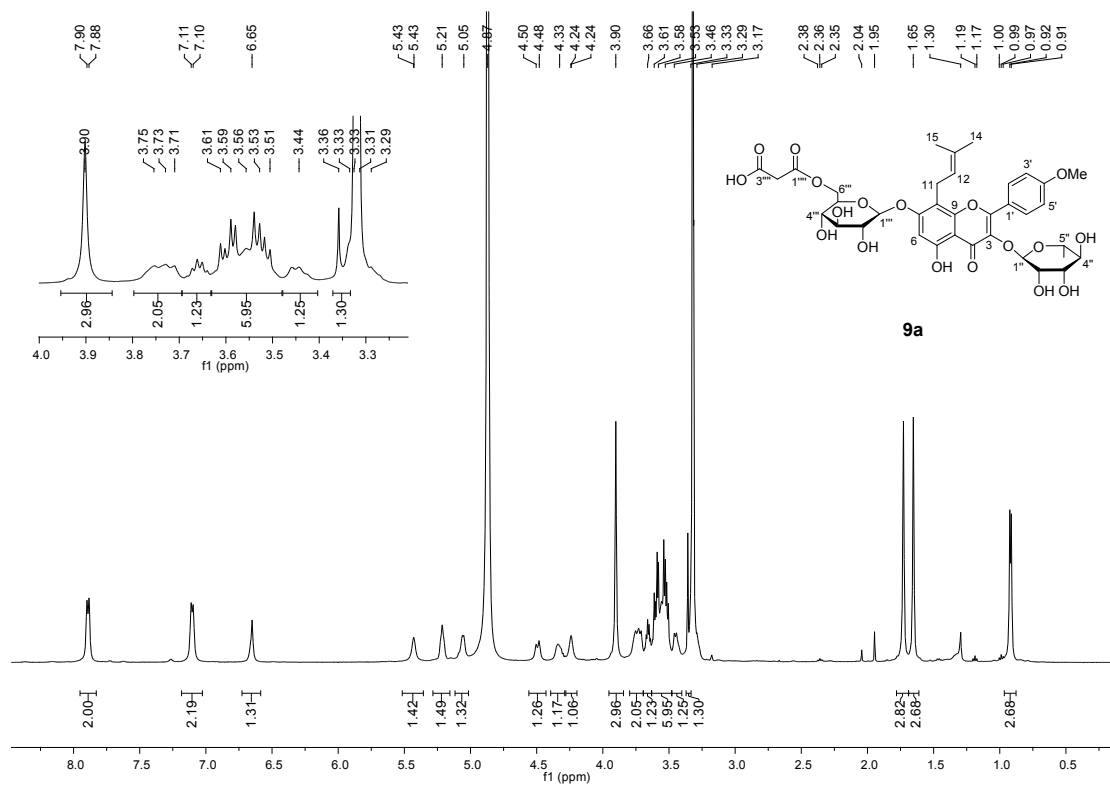

**Figures S19.**  $^1\text{H}$  NMR spectrum of malonylated product **9a** in Methanol- $d_4$ .

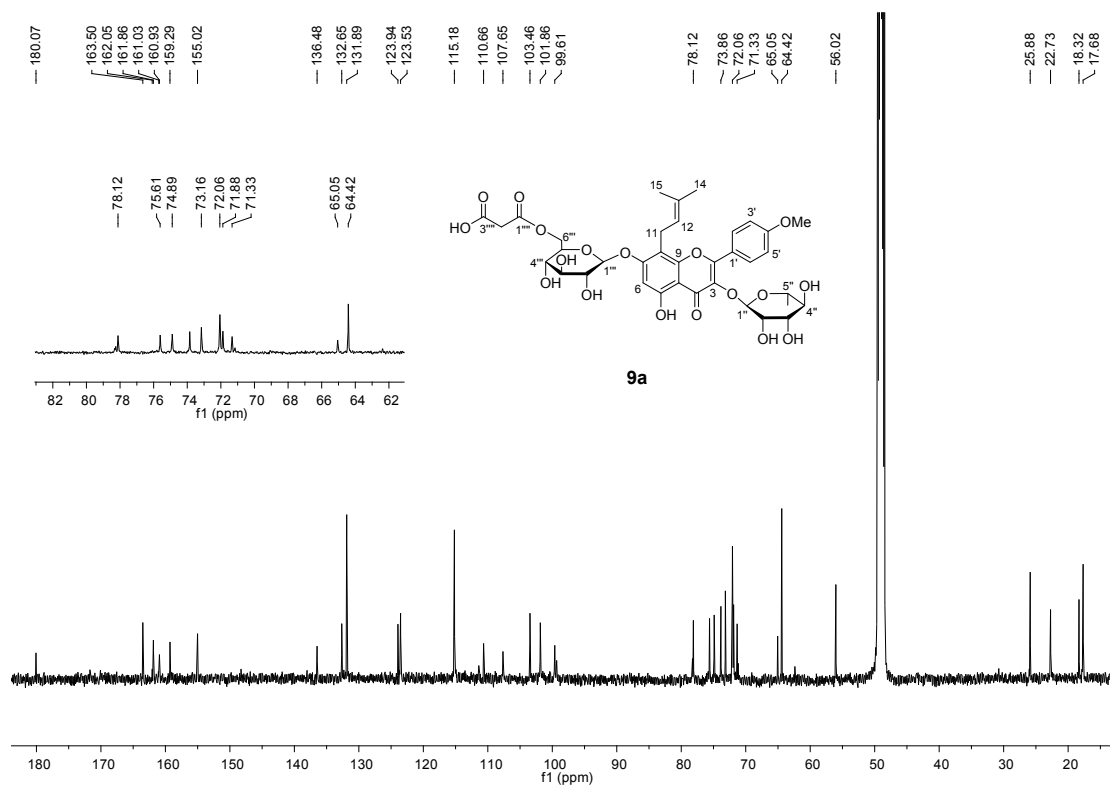

**Figures S20.**  $^{13}\text{C}$  NMR spectrum of malonylated product **9a** in Methanol- $d_4$ .

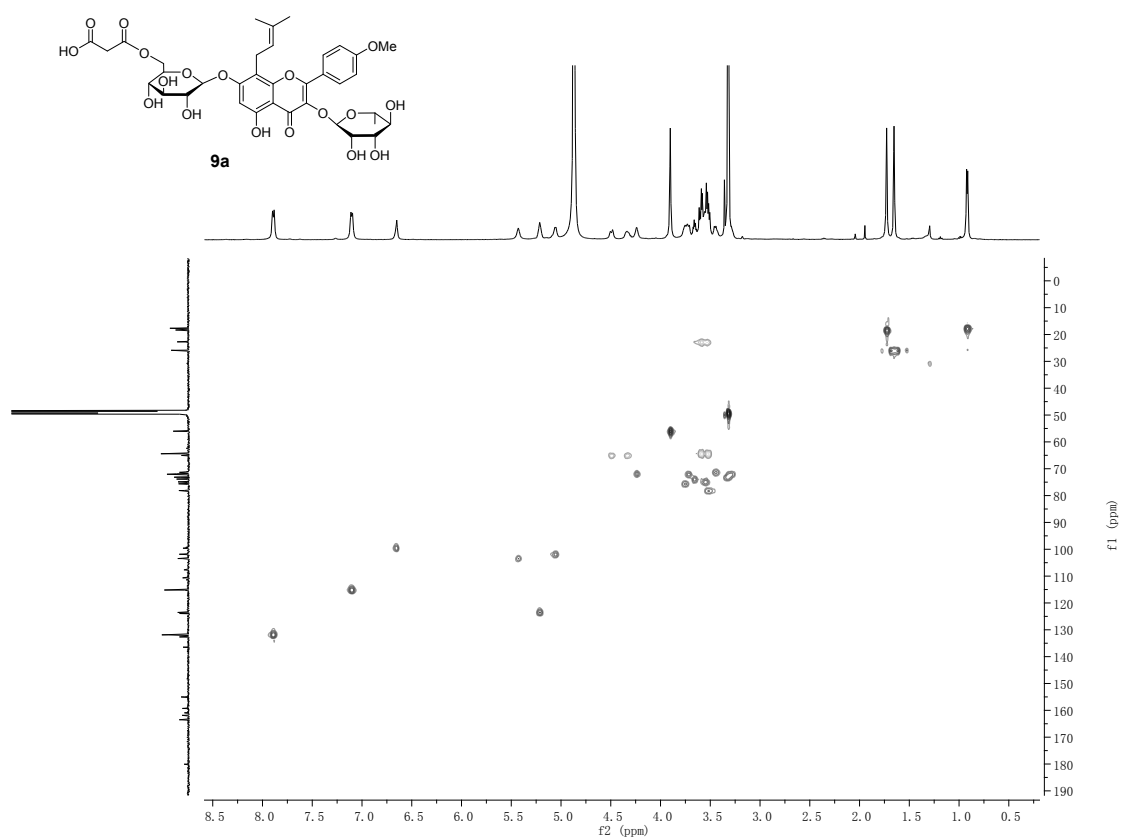

Figures S21. HSQC spectrum of malonylated product **9a** in Methanol- $d_4$ .

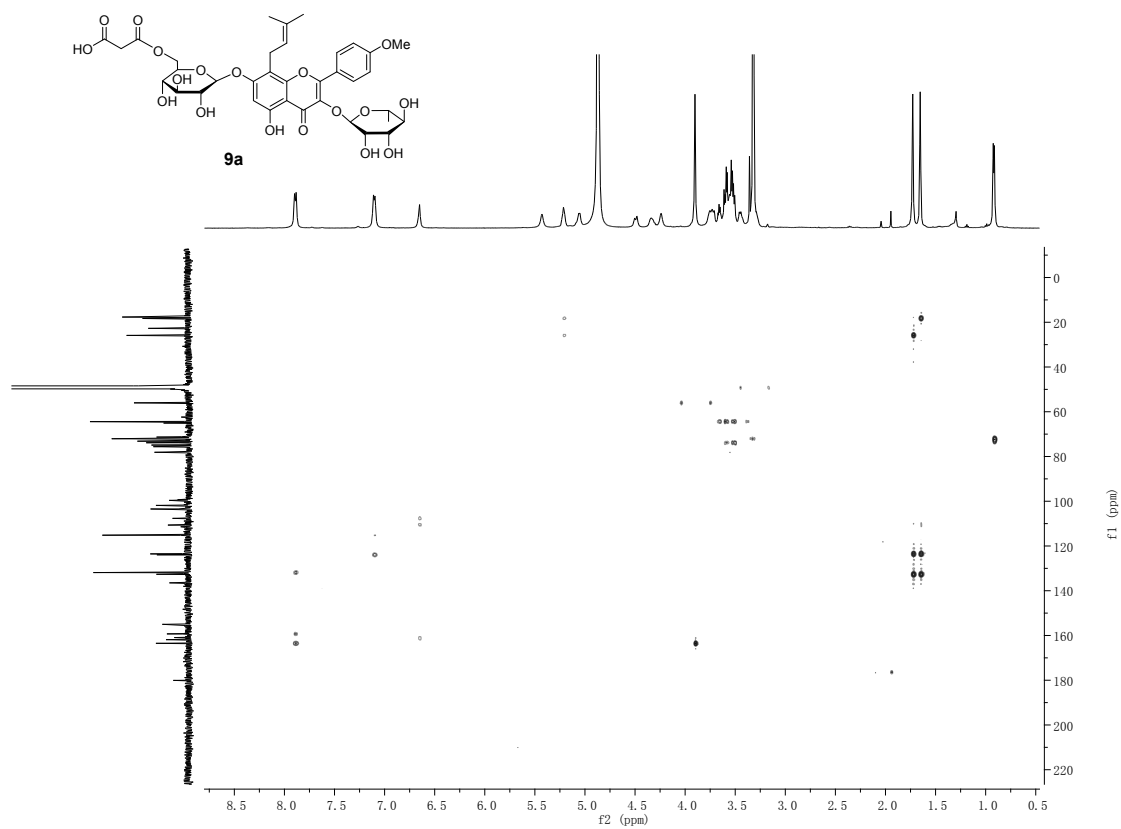

Figures S22. HMBC spectrum of malonylated product **9a** in Methanol- $d_4$ .

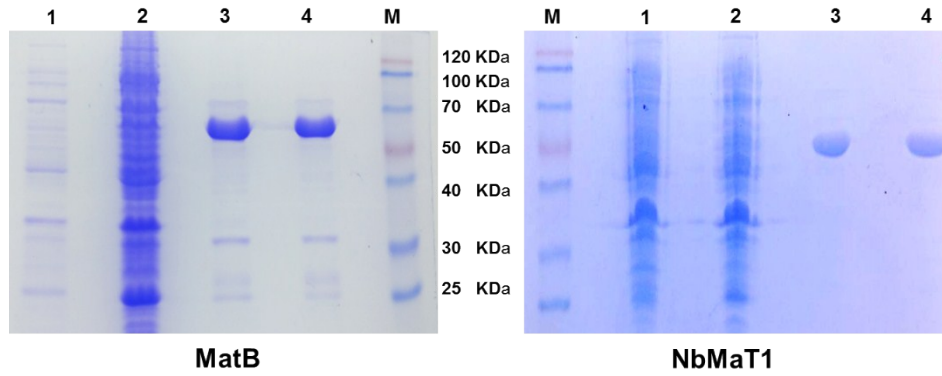

**Figure S23.** Heterogenous expression and purification of targeted His<sub>6</sub>-tag fusion proteins after gene expression.

The 10% (w/v) SDS polyacrylamide gel was stained with Coomassie Brilliant Blue G-250;

Lane M, molecular mass standards;

Lane 1, soluble protein before induction;

Lane 2, soluble protein after IPTG induction;

Lane 3&4, purified His<sub>6</sub> fusion protein of MatB (60.07 KDa) and NbMaT1 (50.91KDa).
